# Supplementary material
Source: Research Square preprint supplement (doi:10.21203/rs.3.rs-10030642/v1)
Supplement: Supplementary file 1 [file 2c000c2fb6de7a487689aed9.docx]

**Table 9.** The highest percentage of female students’ perception

| **Maluku** | | | | **NTT** | | | | **Papua** | | |
| --- | --- | --- | --- | --- | --- | --- | --- | --- | --- | --- |
| **Indicator** | **Level of Agreement** | **Percentage** | **Indica tor** | | **Level of Agreement** | **Percentage** | **Indica tor** | | **Level of Agreement** | **Percentage** |
| PE1 | Strongly Agree | 62,1% | PE1 | | Agree | 64,1% | PE1 | | Agree | 69,4% |
| PE2 | Agree | 48,3% | PE2 | | Agree | 73,4% | PE2 | | Agree | 73,2% |
| PE3 | Strongly Agree | 51,7% | PE3 | | Agree | 67,4% | PE3 | | Agree | 67,5% |
| EF1 | Strongly Agree | 48,3% | EF1 | | Agree | 71,2% | EF1 | | Agree | 71,3% |
| EF3 | Strongly Agree | 44,8% | EF3 | | Agree | 75% | EF3 | | Agree | 70,7% |
| SI3 | Strongly Agree | 41,4% | SI3 | | Agree | 76,1% | SI3 | | Agree | 66,9% |
| KMF1 | Agree | 58,6% | KMF1 | | Agree | 73,9% | KMF1 | | Agree | 72,6% |
| KMF2 | Strongly Agree | 41,4% | KMF2 | | Agree | 72,8% | KMF2 | | Agree | 74,5% |
| KMF3 | Strongly Agree | 55,2% | KMF3 | | Agree | 72,3% | KMF3 | | Agree | 72,6% |
| BI1 | Strongly Agree | 58,6% | BI1 | | Agree | 71,7% | BI1 | | Agree | 73,2% |
| BI3 | Strongly Agree | 58,6% | BI3 | | Agree | 75% | BI3 | | Agree | 71,3% |
| UB1 | Strongly Agree | 55,2% | UB1 | | Agree | 75% | UB1 | | Agree | 70,1% |
| UB2 | Strongly Agree | 72,4% | UB2 | | Agree | 67,9% | UB2 | | Agree | 69,4% |
